1 **Title:**

2 Full title: Tuning intermediate filament mechanics by indirect and direct charge variations

3 Short title: Tuning intermediate filament mechanics

4 **Authors:** Anna V. Schepers<sup>1</sup>, Charlotta Lorenz<sup>1</sup>, and Sarah Köster<sup>1\*</sup>

5 **Affiliation:** 1. Institute for X-Ray Physics, University of Goettingen,

6 Friedrich-Hund-Platz 1, 37077 Göttingen, Germany

7 \*Corresponding author. Email: sarah.koester@phys.uni-goettingen.de

8 **Abstract**

9 The cytoskeleton is formed by three types of filamentous proteins – microtubules, actin fila-  
10 ments, and intermediate filaments (IFs) – and enables cells to withstand external and internal  
11 forces. Vimentin is the most abundant IF in humans and has remarkable mechanical properties,  
12 such as high extensibility and stability. It is, however, unclear to which extent these properties  
13 are influenced by the electrostatic environment. Here, we study the mechanical properties of  
14 single vimentin filaments by employing optical trapping combined with microfluidics. Force-  
15 strain curves, recorded at varying ion concentrations and pH values, reveal that the mechanical  
16 properties of single vimentin IFs are influenced by direct (pH) and indirect (ionic) charge vari-  
17 ations. By combination with Monte Carlo simulations, we connect these altered mechanics to  
18 electrostatic interactions of subunits within the filaments. We thus find possible mechanisms  
19 that allow cells to locally tune their stiffness without remodelling the entire cytoskeleton.

20 **One-Sentence-Summary:** Adaptable force-strain behaviour of single cytoskeletal filaments  
21 in varying electrostatic conditions allow cells to tune their mechanical properties rapidly and  
22 locally.

## 23 MAIN TEXT

### 24 Introduction

25 It is meanwhile well accepted that the mechanical properties of cells are, to a large extent,  
26 governed by the cytoskeleton, a stabilising, yet flexible framework, which is composed of mi-  
27 crotubules, actin filaments, and intermediate filaments (IFs), together with motor proteins and  
28 crosslinkers. While microtubules and actin filaments are conserved in eukaryotic cell types,  
29 there are around 70 different genes encoding IFs in man that are expressed according to the  
30 cell's specific requirements (1, 2).

31 Despite differences in their amino acid sequence, all cytoskeletal IF proteins share their sec-  
32 ondary structure with a tripartite alpha-helical rod and disordered head and tail domains (3, 4).  
33 During the hierarchical assembly, two monomers form a parallel coiled coil and these dimers  
34 organise into anti-parallel tetramers in a half-staggered arrangement. The tetramers assemble  
35 laterally to form unit length filaments (ULFs), which in turn elongate to filaments by end-to-end  
36 annealing (3). The resulting biopolymer comprises a complex high-order arrangement of coiled  
37 coils (3), which allows IFs to be extended up to at least 4.5-fold their initial length (5–7). This  
38 enormous extensibility is in stark contrast to microtubules and F-actin (8).

39 Vimentin is the IF typically expressed in mesenchymal cells (2) and up-regulated during the  
40 epithelial-to-mesenchymal transition in wound healing, early embryogenesis, and cancer meta-  
41 stasis (9). In addition to being highly extensible (7, 10, 11) vimentin is flexible (12–14) and  
42 stable (15). During stretching, three regimes are observed in the force-strain data (7, 10, 11, 16,  
43 17): an initial linear, elastic increase, a plateau of relatively constant force, and a subsequent  
44 stiffening regime. These regimes have been linked to structural changes in the protein (16). The  
45 initial linear increase is described as elastic stretching of the filament consisting of the alpha-

46 helices, the plateau as the unfolding of alpha-helical structures, and the stiffening as the further  
47 stretching of the unfolded structure.

48 A similar three-regime force-distance behaviour has been found for single coiled coils (*18, 19*),  
49 which are a common theme in protein structures. The overall structural stability of coiled coils  
50 depends on the buffer conditions, however, the results are partially conflicting. Some studies  
51 show an increased stability at low pH compared to neutral pH (*20, 21*), whereas others find  
52 higher stability in neutral pH conditions (*22, 23*). It has been discussed that the response of  
53 a coiled coil to altered pH conditions depends on the concentration of salt ions in the buffer  
54 but also on the sequence of the peptide (*24*). Molecular dynamics simulations of the isolated  
55 vimentin coiled-coil dimer (*17*) agree qualitatively with experimental force-strain curves of  
56 single coiled coils (*18, 19, 25*) and vimentin filaments (*7, 11*). These results indicate that coiled  
57 coils play a pivotal role in the force-strain response of mature IFs.

58 Here we address the open question of how strongly the variability of the mechanical response  
59 observed for coiled coils in different measurement conditions is conserved in fully assembled  
60 vimentin IFs. We study the response of mature vimentin IFs to tuning of the ionic conditions of  
61 the buffer and to the internal charge distribution in the protein by adjusting the pH of the buffer,  
62 and find that both factors strongly influence the mechanics of single vimentin IFs. Monte-Carlo  
63 simulations enable us to link electrostatic interactions within the filament and modifications of  
64 the free energy landscape of the unfolding reaction to the observed force-strain behaviour. The  
65 possibility to tune filament mechanics fast and locally may have important implications within  
66 living cells.

## 67 **Results**

### 68 **Cations stiffen single vimentin IFs**

69 To investigate the effect of the ionic environment on the mechanical behaviour of single vi-  
70 mentin filaments, we stretch the filaments after incubation in different buffers. For compar-  
71 ability, all filaments are assembled in standard assembly buffer (2 mM phosphate buffer (PB)  
72 with 100 mM KCl, pH 7.5, see Fig. 1a for a schematic representation of the hierarchical as-  
73 sembly pathway) before the stretching experiment. A single filament is then tethered to optic-  
74 ally trapped beads and incubated in the respective measuring buffer for 30 s before stretching.  
75 A graphical protocol of the experiment is shown in Fig. 1b. Fig. 1c shows a typical resulting  
76 force-strain curve, where the strain is defined as  $\varepsilon = (L - L_0)/L_0$  with the original filament  
77 length,  $L_0$ , measured at 5 pN force.

78 The mechanical response of single filaments to stretching shows a clear dependence on the ex-  
79 perimental conditions, as shown in Fig. 2. All panels show average data and the individual  
80 curves are omitted here for clarity, but are shown in Supplementary Figs. S1 and S2. The three  
81 regimes that have been previously reported (7, 10, 11, 16, 17) are evident in the force-strain data  
82 recorded under standard assembly conditions as shown in Fig. 2a (100 mM KCl, see legend for  
83 colour code): The initial linear increase (I in Fig. 1c), the plateau (II) and the subsequent stiff-  
84 ening at high strains (III) can be clearly distinguished. Note that what we describe as “plateau”  
85 here does not necessarily have a slope of zero, but a considerably decreased slope compared to  
86 the rest of the curve. The curves recorded at high salt concentrations, *i.e.*  $c(\text{KCl}) = 100$  mM  
87 or 150 mM and  $c(\text{MgCl}_2) = 5$  mM or 10 mM, are consistent with this mechanical behaviour.  
88 In particular, the initial slopes, which describe the initial elasticity of the filament, agree well  
89 between these four salt conditions, as shown in detail by the solid circles in Fig. 3a. These values

90 are determined by fitting the initial slopes of the individual force-strain curves (Supplementary  
91 Figs. S1 and S2).

92 When the filaments are incubated in low salt buffer (PB, pH 7.5), where tetramers are known  
93 to be stable (26), before stretching, the mechanics change significantly. Fig. 2a shows that  
94 the complete curve is shifted to lower forces, the initial slope is lower and the plateau is less  
95 pronounced. The decreased initial slope is indicative of a softer material. As a consequence of  
96 this softening, the filament can be stretched to higher strains as compared to high salt buffers  
97 before the maximum force of the optical trap is reached. The curve measured at 50 mM KCl  
98 lies between the data for low salt buffer and the standard assembly buffer curve, as does the  
99 maximum strain for this condition. Independent of the measuring conditions, the strain at which  
100 the initial linear increase ends is at  $\varepsilon_I = 0.14 \pm 0.04$  (see Fig. 2a), showing that the elastic  
101 extensibility of the filament is not affected by the salt ions. It is remarkable that the slope of the  
102 plateau is constant for all buffers, as shown in Fig. 3a by the open circles.

103 Amino acids, the building blocks of proteins, may be either hydrophobic, polar or charged.  
104 Ions in the buffer interact with those polar and charged amino acids that are accessible within a  
105 supramolecular structure, thus mediating interactions within the assembled filament. Here, we  
106 refer to such electrostatic interactions caused by ions in the buffer as *indirect* charge effects.  
107 The similarity between the curves at  $c(\text{KCl}) = 100$  mM or 150 mM and  $c(\text{MgCl}_2) = 5$  mM or  
108 10 mM indicates that predominantly the cations are causing the different behaviour and not the  
109  $\text{Cl}^-$  anions. In contrast, if it were mainly the  $\text{Cl}^-$  ions that caused the stiffening of the filaments,  
110 we would expect the curve at  $c(\text{KCl}) = 50$  mM to lie above both  $\text{MgCl}_2$  curves since  $c_{\text{KCl}}(\text{Cl}^-) >$   
111  $c_{\text{MgCl}_2}(\text{Cl}^-)$  for all measured buffers.

112 The cations do not only stiffen but also stabilise the single filaments as shown in Fig. 3b by

113 the relative count of stable filaments (solid bars), metastable filaments (cross-hatched bars),  
114 and instable filaments (open bars). The stability is defined according to the maximum force  
115 reached during stretching,  $F_{max}$ . Filaments are sorted into the groups presented in Fig. 1c  
116 (instable:  $F_{max} < 100$  pN, metastable:  $100 \text{ pN} < F_{max} < 650$  pN, stable filaments:  
117  $F_{max} > 650$  pN or bead pulled out of trap). The fraction of stable filaments increases from  
118 0.45 for the measurements in low salt buffer to  $0.84 \pm 0.06$  (average and standard deviation  
119 from data at  $c(\text{KCl}) = 100$  mM and 150 mM, and  $c(\text{MgCl}_2) = 5$  mM and 10 mM) at higher  
120 salt concentrations. The cations additionally promote bundling (see Supplementary Fig. S3a).  
121 This observation agrees well with the reported behaviour of vimentin networks where – with  
122 increasing concentrations of multivalent ions – freely fluctuating networks collapse to dense  
123 aggregates (27). Combined with these findings, our results show that the  $c(\text{Mg}^{2+})$  dependent  
124 stiffening of vimentin networks, as previously suggested by rheology experiments (13), is solely  
125 due to stronger interactions between filaments and no additional stiffening of single filaments  
126 in the network.

## 127 **IF mechanics adapt to pH changes**

128 Whereas the interactions of ions with the protein described in the previous section represent  
129 an indirect charge effect on the filament, we can also *directly* manipulate the charge of specific  
130 amino acids, *e.g.* by varying the pH of the buffer. To keep the two effects separate, at first,  
131 we use the curve recorded in the low salt buffer (2 mM PB, pH 7.5) as a starting point and do  
132 not add any additional salt ions. As the cytoplasmic pH in eukaryotic cells is reported to lie  
133 between 7.0 and 7.4 (28), we lower the pH to 7.0. The resulting curves are shifted to higher  
134 forces and the plateau region is shorter compared to the low salt buffer at pH 7.5 (see Fig. 2b  
135 and Supplementary Fig. S2c,d). The stiffening effect is amplified at even lower pH as shown  
136 by data for pH 6.5 and pH 5.8. The curves recorded in these low pH conditions are remarkably

137 similar to each other and the filaments are considerably stiffer than in all previous measurement  
138 conditions with the plateau almost disappearing. If we, in contrast, increase the pH from 7.5  
139 to 8.5, the mechanics of the filament do not change. Thus, the adaption of the filament occurs  
140 between pH 6.5 to 7.5 and it assumes an intermediate state at pH 7.0.

141 In line with the observations for varying salt concentrations reported above, the strain reached  
142 with the initial, linear increase ( $\varepsilon_I = 0.17 \pm 0.03$ ) is not strongly influenced by the pH of the  
143 measurement buffer. This result shows that the elastic extensibility of the filament is neither  
144 strongly affected by direct nor by indirect charges. Additionally, the initial slope at low pH is  
145 the same as for the standard assembly buffer or high salt concentrations (Fig. 3a,c), indicating  
146 that low pH and high salt have a similar effect on the initial stiffness of the filament. The  
147 decrease of the initial slope with increasing pH is plotted by solid circles in Fig. 3c and is evident  
148 in the force-strain curves at low strains in Fig. 2b. In contrast to the cations, the pH clearly  
149 affects the unfolding mechanism responsible for the plateau formation and the increased slope  
150 of the plateau region at low pH suggests that the force needed for unfolding events increases  
151 with decreasing pH. Because the onset of the stiffening moves to lower strains for low pH, the  
152 strain range of the plateau becomes very short. Unlike for filaments in varying salt conditions  
153 (Supplementary Fig. S4a), the ratio of the initial slope and slope of the plateau does not change  
154 with the pH (Supplementary Fig. S4b).

155 Taken together, our force-strain data on vimentin IFs at different pH values show that the over-  
156 all stiffness of the filament and the unfolding are altered considerably when the charge of a few  
157 specific amino acids is varied. This assumption is further supported by the stability behaviour of  
158 the filaments (see Fig. 3d). Here, the fraction of stable filaments, represented by solid bars, de-  
159 creases with increasing pH, from 0.92 at pH 5.8 to 0.27 at pH 8.5, while the force-strain curves  
160 do not change between pH 7.5 and 8.5 or between 5.8 and 6.5. A stabilisation or destabilisa-

161 tion therefore still continues even if the force-strain behaviour of the stable filaments are not  
162 affected.

### 163 **IF stiffening saturates at low pH**

164 We observe an overall weaker stiffening by indirect (cationic) charge shifts compared to direct  
165 (pH) charge shifts on single vimentin filaments. This phenomenon is especially prominent in  
166 the plateau regions. To understand the interplay of the two effects, we compare two sets of  
167 data recorded at different pH (7.5 and 5.8) without additional salt and with 100 mM KCl each.  
168 The four average curves are shown in Fig. 2c. At pH 5.8, 100 mM KCl does not have a strong  
169 effect, and the curves with and without additional salt are strikingly similar (purple), especially  
170 when compared to the pronounced effect of 100 mM KCl at pH 7.5 (green). This observation  
171 suggests that the stiffening is already saturated at low pH without salt and the ions only have  
172 a negligible effect. To ensure that the saturation of the stiffening we observe at low pH is  
173 constant on the time scales accessible here, we further investigate the temporal evolution of  
174 the adaptation of the mechanics of the filament at low pH. The negligible difference between  
175 curves (Supplementary Fig. S5) recorded at incubation times of 15 s, 30 s, and 60 s shows that  
176 the additional interactions within the filaments have developed already after a few seconds.

### 177 **Variations in the free energy landscapes influence filament mechanics**

178 The observed filament softening in low salt buffer and stiffening at low pH raises the question  
179 of how these mechanical properties are governed by molecular charge interactions within the  
180 filament. To answer this question, we first regard the initial slope of the force-strain curves in  
181 Fig. 2. The initial slope decreases when fewer monovalent cations are present and increases with  
182 decreasing pH. In our 1D experimental setting, we can interpret the initial slope as a measure of  
183 the filament stiffness, which for the sake of modelling we describe by the spring constant of the



184 filament,  $\kappa_f$ . We expect an increase with the number of monomers,  $N$ , per cross-section of the  
185 filament (29). We can, however, exclude the possibility of a reorganisation of mature filaments  
186 *in vitro* by addition or loss of subunits as it only occurs on timescales of tens of minutes (30)  
187 which is much slower than the time scales of our experiments. We can therefore safely assume  
188 that the number of monomers is constant during our experiments. Instead, stiffening of the  
189 filament may originate from an increase of the spring constant of an individual alpha-helix,  $\kappa_\alpha$ ,  
190 as shown in the Monte-Carlo simulated force-strain curves in Fig. 4a. An increased stiffness  
191 can furthermore be explained if we regard the filament as a bundle of protofilaments. If these  
192 protofilaments are fully coupled to each other, the persistence length of the bundle increases as  
193  $N^2$  instead of linearly in  $N$  in the uncoupled case (29). An increase in coupling strength and  
194 thus an increased initial slope may be caused by higher salt concentration or lower pH and is  
195 thus in line with our experimental results. It should be noted, however, that we do not include  
196 this effect in our simulations. Instead, we simulate ‘subunit coupling’, see Fig. 4b, that describes  
197 the size of fully coupled lateral subunits into which the monomers are organised (31). Thus,  
198 in higher order subunits, more elements have to unfold simultaneously to achieve the length  
199 change,  $\Delta L$ , of the filament. This effect already plays a role for the initial stretching and leads  
200 to a slightly increased slope (see inset of Fig. 4b).

201 The origin of intra-filament coupling is found in the structure of vimentin. Each vimentin  
202 monomer has an excess of -19  $e$  negative charges. A representation of the charge distribution  
203 in the vimentin monomer is shown in Fig. 5a. The excess negative charges are mostly found in  
204 coil 1B, coil 2 and the tail. As most polar and charged amino acids are not buried within the  
205 alpha-helix (32), the excess negative charges of neighbouring monomers within the filaments  
206 are likely to be in close proximity. The resulting repulsion presumably destabilises the filament  
207 structure. The decreased initial slope and reduced stability we observe in low salt conditions

208 therefore indicates that cations screen or – in case of multivalent ions – cross-bridge these  
209 repulsions. This is supported by the fact that vimentin is known to assemble in the presence of  
210 a sufficiently high concentration of cations and to disassemble in low salt buffer (26).

211 In contrast to the ion mediated, indirect, electrostatic effect, a pH change directly influences the  
212 charge pattern of the protein sequence. To be specific, in the pH range used here, we switch his-  
213 tidines from being uncharged to positively charged in an acidic environment. In vimentin there  
214 are six histidines at various positions, indicated by the arrows in Fig. 5a. These additional pos-  
215 itive charges increase the number of possible electrostatic interaction sites between monomers  
216 in the filament (Fig. 5b), and therefore in our case decrease the repulsion, increase attraction,  
217 and promote coupling in the filament, similar to added ions.

218 Whereas the change of the initial slope is well explained by variations of  $\kappa_\alpha$ , other experiment-  
219 ally observed changes in the force-strain curves, such as the plateau slope and length are not  
220 reproduced by this variation. To be able to compare the mechanisms that affect the plateau, we  
221 first examine the unfolding reaction that leads to the plateau formation. The force level of the  
222 plateau  $F_{\text{plateau}}$  (Fig. S6), the force reached at strain  $\varepsilon_1$ , is a measure of the energy necessary  
223 for unfolding. Fig. 4c shows a schematic and simplified energy landscape for the transition  
224 from the alpha- to the unfolded state (green). The energy barrier  $E_A$  between the two states is  
225 indicated in Fig. 4d. The optical trap is approximated by a harmonic potential (dashed line). By  
226 applying a force (Fig. 4d), the harmonic potential is moved to the right, thereby decreasing the  
227 energy barrier in the total potential (blue) and the unfolded state becomes more probable.

228 The simulated force-strain curves in Fig. 4b reveal a strong dependence of  $F_{\text{plateau}}$  on the subunit  
229 size. By choosing a small subunit size such as  $N_{\text{sub}} = 4$  we are able to reproduce the observed  
230 decrease of  $F_{\text{plateau}}$  in low salt buffer. At low pH,  $F_{\text{plateau}}$  is even higher than in high salt buffer.

231 Thus,  $E_A$  is apparently even further increased at low pH. This behaviour may be explained by  
232 an increased free energy difference,  $\Delta G$ , between the alpha- and unfolded state (purple curve  
233 in Fig. 4h as compared to green curve in Fig. 4d), thus rendering the transition from the alpha-  
234 to the unfolded state less probable at the same applied force (Fig. 4g,h), effectively increasing  
235  $F_{\text{plateau}}$ . Fig. 4e shows how  $\Delta G$  influences the force-strain curve.

236 In addition to an increased  $F_{\text{plateau}}$ , we also observe a shortening of the plateau at low pH  
237 (Fig. 2b). The length of the plateau,  $\varepsilon_{\text{II}} - \varepsilon_{\text{I}}$ , depends on the number of unfolding events  
238 and the length increase during unfolding,  $\Delta L$ . Here, by the ‘number of unfolding events’ we  
239 summarise (i) fully unfolded ULFs and (ii) partially unfolded ULFs, as each of them consists  
240 of 32 monomers with three coils each, which can unfold fully or in parts. As  $\varepsilon_{\text{I}}$  is relatively  
241 constant in all measuring conditions,  $\varepsilon_{\text{II}}$  is a measure for the length of the plateau. Fig. 4f  
242 demonstrates how a decrease of  $\Delta L$  shortens the plateau.

243 Earlier interpretations of the plateau being a transition from the alpha-helices to beta-sheets  
244 would allow for an elongation to strain 0.77 (7, 17) in the plateau. This value agrees with  $\varepsilon_{\text{II}}$  at  
245 high salt concentrations, but is exceeded at low salt conditions and not reached at low pH values  
246 (Fig. 2). Recent results indicate that the unfolding is in fact not a two-state process but that  
247 alpha-helices first unfold to a random coil structure (33). These random coils could be either  
248 longer or shorter than the beta-sheet conformation and thereby explain the variations in  $\Delta L$ .  
249 The remarkably short plateaus we observe at low pH indicate a strong influence of the pH on  
250  $\Delta L$ . From the simulation in Fig. 4f we learn that decreasing  $\Delta L$  furthermore increases the slope  
251 of the plateau, which agrees well with the increase of the slope we observe at low pH (Fig. 3c).  
252 The additional positive charges located at the sites of the histidines might act as crosslinkers in  
253 the filament, ‘locking’ the monomers in place and thereby decreasing  $\Delta L$ .

254 Combining the simulations and the experimental results, we are now able to explain the ob-  
255 served increase of the initial slope, shortening of the plateau, shift to higher forces  $F_{\text{plateau}}$  at  
256 low pH or high salt conditions by increased subunit coupling and decreased  $\Delta L$ . Additionally,  
257 for the low pH conditions, a more pronounced  $\Delta G$  comes into play, whereas for high salt,  $\kappa_{\alpha}$   
258 is increased. The slope of the plateau can be modelled by a decrease of the subunit size or of  
259  $\Delta L$ . As we observe no change of the slope of the plateau throughout all salt conditions at pH  
260 7.5, these effects seem to be balance out during the plateau formation.

## 261 Discussion

262 Previous studies of the stability of single coiled coils at varying pH and ionic strength showed  
263 partially conflicting results (20, 22, 24). These opposing observations can be understood in  
264 the light of different primary sequences that lead to coiled coils of varying stability, based on  
265 the length of the coils (19), the hydrophobic packing or helix propensity, *i.e.* how prone an  
266 amino acid is to form alpha-helical structures (25), and electrostatic interactions in the coil  
267 (20, 22, 24). The effect of the electrostatic environment we report here is valid for vimentin  
268 but might be considerably weaker or stronger for other types of IFs. As the charge patterns in  
269 different types of IFs vary, the extent of the effect of salt ions scales according to the strength  
270 of the repulsion between subunits in the different IFs. For example, similar IFs, such as desmin  
271 and glial fibrillary acidic protein (GFAP) have an excess charge of  $-15 e$  and  $-13 e$ , respectively.  
272 We therefore expect the effect of ions to be weaker in these filaments (1). We further expect the  
273 effect of pH changes in the physiologically relevant range to scale with the number of histidines  
274 per monomer. Whereas vimentin and desmin have six histidines ( $N_H = 6$ ), GFAP ( $N_H = 8$ )  
275 contains more potential additional interaction sites at low pH (1). The effect in GFAP may  
276 therefore be even stronger than observed here for vimentin.

277 As the cytoplasmic pH typically lies between 7.0-7.5 (34), the mechanical properties of vi-  
278 mentin are susceptible to pH changes in this range. Thus, cells are equipped with a “tool” to  
279 rapidly and locally tune their stiffness without remodelling the whole cytoskeleton. However,  
280 it remains unclear, how relevant the adaptability of the IF mechanics is in living cells. One  
281 intriguing phenomenon, where considerable pH changes and the up-regulation of vimentin in  
282 epithelial cells coincide, is wound healing. In epithelial wounds, mesenchymal cells expressing  
283 vimentin promote healing of the skin. During the restoration of the tissue, these cells might  
284 be exposed to pH milieus reaching from the healthy skin pH (4.0-6.0) to the body’s internal  
285 pH (7.0-7.4) (28, 35). Vimentin is not only up-regulated in the cells but also excreted into the  
286 extracellular space (36). The result of our studies suggest that the mechanical changes vimentin  
287 undergoes in this pH range are considerable and might play a role within cells as well as the  
288 extracellular space during skin repair.

289 To conclude, we directly relate the mechanical response of single vimentin filaments to stretch-  
290 ing in different buffer conditions to variations in the molecular electrostatic interactions in the  
291 filament. Our results show that the strong response to the electrostatic environment reported for  
292 coiled coils is preserved in mature vimentin filaments. A likely interpretation is that salt ions  
293 in the buffer screen or bridge electrostatic repulsion in the hierarchical structure and thereby  
294 stabilise the filaments. Additional positive charges in the amino acid sequence caused by a  
295 lowered pH stabilise and stiffen vimentin filaments as well. Thus, our results indicate that the  
296 mechanical role of IFs in cells can adapt to local pH and ion concentrations. Both effects, salt  
297 and pH, may allow cells to locally tune their stiffness without having to rebuild the entire cyto-  
298 skeleton and thereby adapt their mechanics to varying requirements. In this context, we show  
299 that stiffening of vimentin networks that was previously reported upon the addition of  $Mg^{2+}$   
300 relies on increased inter-filament interactions and does not originate from stiffening of single

301 filaments. Thus, by ensuring a relatively constant stiffness, extensibility, force-strain behaviour,  
302 and stability of the filaments at physiological potassium concentrations and in conditions that  
303 are known to affect the bundling behaviour of vimentin, we suggest that network mechanics can  
304 be tuned independent of the single filament properties.

## 305 **Materials and methods**

### 306 **Experimental Design**

307 The experiments were performed using a setup that combines optical traps, confocal micro-  
308 scopy and microfluidics (C-Trap, Lumicks, Netherlands). A four-inlet glass microfluidic flow  
309 cell enabled easy change of buffer during the experiment as the sub-channels in the flow cell  
310 were separated by laminar flow. The syringes feeding the microfluidic flow cell were driven  
311 by air pressure. Solutions were injected into the four channels as follows and as shown in  
312 Supplementary Fig. S8a: 1: beads in measuring buffer, 2: measuring buffer, 3: assembly buf-  
313 fer, 4: vimentin in assembly buffer. Figure 1b shows a simplified sketch, excluding channel  
314 2 that is used for calibration of the traps. For the optical trap measurements, the filaments  
315 were diluted 150-fold in assembly buffer. Maleimide-functionalised polystyrene beads (Kisker  
316 Biotech, Steinfurt, Germany) (11, 37) were diluted in measuring buffer. The optical trap was  
317 calibrated by analysis of the power spectral density of the thermal fluctuations of the trapped  
318 beads. Filaments were tethered to trapped beads in assembly buffer in flow. The flow was then  
319 stopped, the beads with the tethered filament were moved to the measuring buffer and the fil-  
320 aments incubated for 30 seconds without flow. The filaments were stretched at a loading rate  
321 of  $0.21 \pm 0.05 \mu\text{m/s}$ . For each condition, force-strain curves of at least seven single, stable  
322 filaments were recorded. As measuring buffers we used 2 mM PB at varying pH (5.8 - 8.5) and  
323 concentrations of KCl (0, 50, 100, 150 mM) or  $\text{MgCl}_2$  (0, 5, 10 mM) (Carl Roth, Germany).  
324 The concentrations and pH conditions given are the buffers that were injected into the micro-  
325 fluidic chip. Because the flow was stopped during incubation and stretching of the filaments,  
326 diffusion of the cations between the assembly and measuring buffers, and the assimilation of the  
327 pH have to be considered. This means that the conditions in proximity to the filament during  
328 the measurement were slightly different to the injected buffer. The temporal development of

329 the salt concentrations and the pH at the measurement position was simulated and is described  
330 below.

### 331 **Protein preparation**

332 Human vimentin (mutant C328N with three additional amino acids, GGC, at the C-terminus)  
333 was recombinantly expressed and purified as previously described (11). The protein was la-  
334 belled with ATTO647N maleimide (ATTO-Tec, Germany) (30, 38). Reconstitution and as-  
335 sembly was performed as previously reported (11). In brief, unlabelled and labelled monomers  
336 were mixed (4% labelling ratio) and reconstituted at room temperature by dialysis into 2 mM  
337 phosphate buffer (PB, Carl Roth, Germany) at pH 7.5, decreasing the Urea (Carl Roth, Ger-  
338 many) concentration every 30 min in steps of 6, 4, 2, 1, 0 M Urea and an subsequent overnight  
339 dialysis step at 8-10 °C. Filaments were assembled by dialysis into assembly buffer (2 mM PB  
340 with 100 mM KCl (Carl Roth, Germany) at pH 7.5) at 36 °C for 16 h at a protein concentration  
341 of 0.2 g/L.

### 342 **Data analysis**

343 From confocal videos of the filament stretching and the force-strain behaviour, bundles were  
344 identified and the force-strain curves of the bundles excluded from further analysis.

345 **Calculation of single force-strain curves:** For each filament, the initial length,  $L_0$ , was de-  
346 termined and used for the calculation of the strain:  $\varepsilon = (L - L_0)/L_0$ . To obtain  $L_0$ , the raw  
347 force-distance curve was smoothed with a moving average with a window width of 10 data  
348 points to account for fluctuations of the trap. The initial length was set as the length at the last  
349 data point before the smoothed curve reached 5 pN.

350 **Analysis of the filament stability:** Data curves were sorted according to the maximum force  
351 reached during stretching,  $F_{max}$ , into the groups presented in Fig. 1c (instable:  $F_{max} < 100$  pN,



352 metastable:  $100 \text{ pN} < F_{max} < 650 \text{ pN}$ , stable filaments:  $F_{max} > 650 \text{ pN}$  or bead pulled out of  
353 trap). For stable and metastable filaments, the force-strain curves were plotted.

354 **Calculation of average force-strain curves:** For each condition, the average maximum strain  
355 of all stable filaments was calculated. Each stable force-strain curve was scaled to the average  
356 maximum strain, interpolated to 200 values, and the forces were averaged. Metastable filaments  
357 were weighted according to the total number of stable and metastable curves and projected onto  
358 the average curve up to their yield-strain (31).

359 **Analysis of the slope of the plateaus:** The plateau of each single force-strain curve was ana-  
360 lysed for all stable filaments as they show a complete plateau. A typical analysis for one single  
361 force-strain curve is shown in Supplementary Fig. S7. The point of maximum strain,  $\varepsilon_{max}$ , of  
362 each curve was used to find the mid data point,  $\varepsilon_{mid}$ , of the curve (yellow in Supplementary  
363 Fig. S7a). The data points with relatively constant slope were determined. To do so, the dif-  
364 ferential of each single force-strain curve was calculated. To account for changes in length of  
365 the curve and noise of the data, each differential force-strain curve was then smoothed using a  
366 moving average with the width of  $\frac{1}{20}$  of the number of data points in the curve before  $\varepsilon_{max}$ . The  
367 values  $\frac{dF}{d\varepsilon}$  at the 10 data points before and after  $\varepsilon_{mid}$  were averaged to find  $\frac{dF}{d\varepsilon}(\varepsilon_{mid})$ . Next, the  
368 first maximum of  $\frac{dF}{d\varepsilon}$ , position A, was calculated (marked in Supplementary Fig. S7a). The first  
369 and last data point to fulfil  $\frac{dF}{d\varepsilon} < \varepsilon_{mid} + 0.35 \cdot \left( \frac{dF}{d\varepsilon}(A) - \frac{dF}{d\varepsilon}(\varepsilon_{mid}) \right)$  were termed  $\varepsilon_I$  (red, solid) and  
370  $\varepsilon_{II}$  (blue, solid), respectively. To ensure that the transition regions between I, II and III were  
371 not included in the analysis of the slope of the plateau, a linear regression (green line) of the  
372 force-strain curve was calculated for the centre 80% of the length of the plateau (between the  
373 open red and blue circles). The mean slope and standard deviation were calculated for each  
374 measuring condition.

375 **Analysis of the force of the plateaus:** For the analysis of  $F_{\text{plateau}}$ ,  $\varepsilon_{\text{I}}$  determined from the  
376 average force-strain curve for each condition was used. The force at  $\varepsilon_{\text{I}}$  for each single force-  
377 strain curve was determined and the mean value and standard deviation were calculated.

378 **Determination of the end points of the elastic and plateau regions:** For the determination  
379 of the slope of the plateau, the regression was calculated over a large region of the force-strain  
380 curve. This approach compensated for noise in the data. However, the noise limits the accurate  
381 determination of  $\varepsilon_{\text{I}}$  and  $\varepsilon_{\text{II}}$ . Therefore, for the analysis of  $\varepsilon_{\text{I}}$  and  $\varepsilon_{\text{II}}$  for each condition, the  
382 average force-strain curves were used as shown in Fig. 2. The average curves were treated in  
383 the same way described above for the single force-strain curves. The only difference was that  
384 here the  $\frac{dF}{d\varepsilon}$  curves were smoothed with a moving average of 15 data points.

385 **Analysis of the initial slope of the force-strain curves:** The initial slope was determined for  
386 strains from 0.02 to 0.1 or to a force of 100 pN, whichever occurred earlier.

### 387 **Flow simulations**

388 A simplified microfluidic chip design (Supplementary Fig. S8a) was used for finite element  
389 method (FEM) simulations with COMSOL Multiphysics 5.3 (COMSOL GmbH, Göttingen,  
390 Germany). Flow and diffusion were simulated for an average velocity of 0.001 m/s lam-  
391 inar inflow for each inlet for water with  $\text{K}^+$  ( $D_{\text{K}} = 1.67 \cdot 10^{-9} \text{ m}^2/\text{s}$ ) (39) or  $\text{Mg}^{2+}$  ( $D_{\text{Mg}} =$   
392  $0.594 \cdot 10^{-9} \text{ m}^2/\text{s}$ ) ions (39). For the pH, the concentration of hydrogen ions  $c(\text{H}^+)$  was cal-  
393 culated as  $c(\text{H}^+) = 10^{-\text{pH}}$  and the diffusion of  $\text{H}^+$  was estimated by ( $D_{\text{H}} = 8.17 \cdot 10^{-9} \text{ m}^2/\text{s}$ )  
394 (39). First, the equilibrium ion distribution in the chip was simulated under flow. Taking this as  
395 a starting condition, a second simulation was calculated without flow, only allowing diffusion.  
396 The change of the concentrations of the cations and  $\text{H}^+$  ions was simulated at the position of  
397 the force-strain measurement (Supplementary Fig. S8a, red mark) for a duration of 5 min. The

398 equilibrium pH is reached within the first minute and then stays relatively constant over time  
399 and in the flow cell. This resulting equilibrium pH was clearly distinguishable for the different  
400 measuring buffers. The change of cation concentrations ( $\text{Mg}^{2+}$  from the measuring buffer,  $\text{K}^+$   
401 from the adjacent assembly buffer) is shown in Supplementary Fig. S8b for the example of the  
402 10 mM  $\text{MgCl}_2$  measuring buffer.

### 403 **Force-strain Monte-Carlo simulations**

404 A vimentin filament was mechanically modelled as previously described (11, 31). The force-  
405 strain behaviour of the modelled filament was determined by a Monte-Carlo simulation written  
406 in MatLab (31). The simulation was run with one varied parameter while keeping the others  
407 constant as shown in Fig. 4a,b,e,f. The default parameters were the alpha-helical spring constant  
408 ( $\kappa_\alpha = 5.5$ ), the number of monomers in a subunit ( $N_{sub} = 32$ ), the free energy difference  
409 between the alpha-state and unfolded state ( $\Delta G = 2$ ) and the length by which an alpha-helix  
410 can extend upon unfolding  $\Delta L = 1$ .

## 411 **Supplementary Materials**

412 Fig. S1. Force-strain curves for each salt condition measured.

413 Fig. S2. Force-strain curves for each pH condition measured.

414 Fig. S3. Relative count of single filaments and bundles for each condition.

415 Fig. S4. Ratio of the initial slope and the slope of the plateau for each measuring condition.

416 Fig. S5. Force-strain curves for filaments stretched in phosphate buffer (PB), pH 5.8 with  
417 varying incubation times.

418 Fig. S6. Plateau force of the force-strain curves.

419 Fig. S7. Analysis of the slope of the plateau for one single force-strain curve.

420 Fig. S8. Results of FEM simulations.

## 421 **References**

422 [1] I. Szeverenyi, A. J. Cassidy, C. W. Chung, B. T. Lee, J. E. Common, S. C. Ogg, H. Chen,  
423 S. Y. Sim, W. L. Goh, K. W. Ng, J. A. Simpson, L. L. Chee, G. H. Eng, B. Li, D. P.  
424 Lunny, D. Chuon, A. Venkatesh, K. H. Khoo, W. I. McLean, Y. P. Lim, and E. B. Lane,  
425 “The human intermediate filament database: comprehensive information on a gene family  
426 involved in many human diseases,” *Hum. Mutat.*, vol. 29, no. 3, pp. 351–360, 2008.

427 [2] J. E. Eriksson, T. Dechat, B. Grin, B. Helfand, M. Mendez, H.-M. Pallari, and R. D. Gold-  
428 man, “Introducing intermediate filaments : from discovery to disease,” *J. Clin. Invest.*,  
429 vol. 119, pp. 1763–1771, 2009.

430 [3] H. Herrmann, M. Häner, M. Brettel, S. A. Müller, K. N. Goldie, B. Fedtke, A. Lustig,  
431 W. W. Franke, and U. Aebi, “Structure and assembly properties of the intermediate fila-

- 432 ment protein vimentin: The role of its head, rod and tail domains,” *J. Mol. Biol.*, vol. 264,  
433 pp. 933–953, 1996.
- 434 [4] A. A. Chernyatina, D. Guzenko, and S. V. Strelkov, “Intermediate filament structure: The  
435 bottom-up approach,” *Curr. Opin. Cell Biol.*, vol. 32, pp. 65–72, 2015.
- 436 [5] L. Kreplak, H. Bär, J. F. Leterrier, H. Herrmann, and U. Aebi, “Exploring the mechanical  
437 behavior of single intermediate filaments,” *J. Mol. Biol.*, vol. 354, pp. 569–577, 2005.
- 438 [6] L. Kreplak, H. Herrmann, and U. Aebi, “Tensile properties of single desmin intermediate  
439 filaments,” *Biophys. J.*, vol. 94, pp. 2790–2799, 2008.
- 440 [7] J. Block, H. Witt, A. Candelli, E. J. G. Peterman, G. J. L. Wuite, A. Janshoff, and S. Köster,  
441 “Nonlinear loading-rate-dependent force response of individual vimentin intermediate fil-  
442 aments to applied strain,” *Phys. Rev. Lett.*, vol. 118, p. 048101, 2017.
- 443 [8] P. A. Janmey, U. Euteneuer, P. Traub, and M. Schliwa, “Viscoelastic properties of vimentin  
444 compared with other filamentous biopolymer networks,” *J. Cell Biol.*, vol. 113, no. 1,  
445 pp. 155–160, 1991.
- 446 [9] M. Zeisberg and E. G. Neilson, “Biomarkers for epithelial-mesenchymal transitions,” *J.*  
447 *Clin. Invest.*, vol. 119, no. 6, pp. 1429–1437, 2009.
- 448 [10] N. Pinto, F.-C. Yang, A. Negishi, M. C. Rheinstä, T. E. Gillis, and D. S. Fudge, “Self-  
449 assembly enhances the strength of fibers made from vimentin intermediate filament pro-  
450 teins,” *Biomacromolecules*, vol. 15, pp. 574–581, 2014.
- 451 [11] J. Block, H. Witt, A. Candelli, J. C. Danes, E. J. Peterman, G. J. Wuite, A. Janshoff, and

- 452 S. Köster, “Viscoelastic properties of vimentin originate from nonequilibrium conforma-  
453 tional changes,” *Sci. Adv.*, vol. 4, p. eaat1161, 2018.
- 454 [12] N. Mücke, L. Kreplak, R. Kirmse, T. Wedig, H. Herrmann, U. Aebi, and J. Langowski,  
455 “Assessing the flexibility of intermediate filaments by atomic force microscopy,” *J. Mol.*  
456 *Biol.*, vol. 335, pp. 1241–1250, 2004.
- 457 [13] Y. C. Lin, C. P. Broedersz, A. C. Rowat, T. Wedig, H. Herrmann, F. C. MacKintosh, and  
458 D. A. Weitz, “Divalent cations crosslink vimentin intermediate filament tail domains to  
459 regulate network mechanics,” *J. Mol. Biol.*, vol. 399, pp. 637–644, 2010.
- 460 [14] B. Nöding and S. Köster, “Intermediate filaments in small configuration spaces,” *Phys.*  
461 *Rev. Lett.*, vol. 108, p. 088101, 2012.
- 462 [15] C. Guzmán, S. Jeney, L. Kreplak, S. Kasas, A. J. Kulik, U. Aebi, and L. Forró, “Explor-  
463 ing the mechanical properties of single vimentin intermediate filaments by atomic force  
464 microscopy,” *J. Mol. Biol.*, vol. 360, pp. 623–630, 2006.
- 465 [16] T. Ackbarow and M. J. Buehler, “Superelasticity, energy dissipation and strain harden-  
466 ing of vimentin coiled-coil intermediate filaments: Atomistic and continuum studies,” *J.*  
467 *Mater. Sci.*, vol. 42, pp. 8771–8787, 2007.
- 468 [17] Z. Qin, L. Kreplak, and M. J. Buehler, “Hierarchical structure controls nanomechanical  
469 properties of vimentin intermediate filaments,” *PLoS ONE*, vol. 4, no. 10, p. e7249, 2009.
- 470 [18] D. D. Root, V. K. Yadavalli, J. G. Forbes, and K. Wang, “Coiled-coil nanomechanics and  
471 uncoiling and unfolding of the superhelix and  $\alpha$ -helices of myosin,” *Biophys. J.*, vol. 90,  
472 pp. 2852–2866, 2006.

- 473 [19] M. Goktas, C. Luo, R. M. A. Sullan, A. E. Bergues-Pupo, R. Lipowsky, A. Vila Verde, and  
474 K. G. Blank, “Molecular mechanics of coiled coils loaded in the shear geometry,” *Chem.*  
475 *Sci.*, vol. 9, pp. 4610–4621, 2018.
- 476 [20] K. Dutta, A. Alexandrov, H. Huang, and S. M. Pascal, “pH-induced folding of an apoptotic  
477 coiled coil,” *Protein Sci.*, vol. 10, pp. 2531–2540, 2001.
- 478 [21] M. M. Stevens, S. Allen, J. K. Sakata, M. C. Davies, C. J. Roberts, S. J. Tendler, D. A.  
479 Tirrell, and P. M. Williams, “pH-Dependent behavior of surface-immobilized artificial  
480 leucine zipper proteins,” *Langmuir*, vol. 20, no. 18, pp. 7747–7752, 2004.
- 481 [22] K. Pagel, S. C. Wagner, K. Samedov, H. Von Berlepsch, C. Böttcher, and B. Kokschi,  
482 “Random coils,  $\beta$ -sheet ribbons, and  $\alpha$ -helical fibers: one peptide adopting three different  
483 secondary structures at will,” *J. Am. Chem. Soc.*, vol. 128, pp. 2196–2197, 2006.
- 484 [23] R. M. Reja, M. Khan, S. K. Singh, R. Misra, A. Shiras, and H. N. Gopi, “pH sensit-  
485 ive coiled coils: A strategy for enhanced liposomal drug delivery,” *Nanoscale*, vol. 8,  
486 pp. 5139–5145, 2016.
- 487 [24] Y. Yu, O. D. Monera, R. S. Hodges, and P. L. Privalov, “Ion pairs significantly stabilize  
488 coiled-coils in the absence of electrolyte,” *J. Mol. Biol.*, vol. 255, pp. 367–372, 1996.
- 489 [25] P. López-García, M. Goktas, A. E. Bergues-Pupo, B. Kokschi, D. Varón Silva, and K. G.  
490 Blank, “Structural determinants of coiled coil mechanics,” *Phys. Chem. Chem. Phys.*,  
491 vol. 21, pp. 9145–9149, 2019.
- 492 [26] H. Herrmann and U. Aebi, “Intermediate filament assembly: fibrillogenesis is driven by  
493 decisive dimer-dimer interactions,” *Curr. Opin. Struc. Biol.*, vol. 8, pp. 177–185, 1998.

- 494 [27] C. Dammann and S. Köster, “Dynamics of counterion-induced attraction between vi-  
495 vimentin filaments followed in microfluidic drops,” *Lab Chip*, vol. 14, pp. 2681–2687, 2014.
- 496 [28] G. R. Bright, G. W. Fisher, J. Rogowska, and D. L. Taylor, “Fluorescence ratio imaging mi-  
497 croscopy: temporal and spatial measurements of cytoplasmic pH,” *J. Cell Biol.*, vol. 104,  
498 pp. 1019–1033, 1987.
- 499 [29] J. F. Nolting, W. Möbius, and S. Köster, “Mechanics of individual keratin bundles in living  
500 cells,” *Biophys. J.*, vol. 107, no. 11, pp. 2693–2699, 2014.
- 501 [30] B. Nöding, H. Herrmann, and S. Köster, “Direct observation of subunit exchange along  
502 mature vimentin intermediate filaments,” *Biophys. J.*, vol. 107, pp. 2923–2931, 2014.
- 503 [31] C. Lorenz, J. Forsting, A. V. Schepers, J. Kraxner, S. Bauch, H. Witt, S. Klumpp,  
504 and S. Köster, “Lateral subunit coupling determines intermediate filament mechanics,”  
505 *bioRxiv*, p. doi10.1101/676197, 2019.
- 506 [32] J. M. Mason and K. M. Arndt, “Coiled coil domains: stability, specificity, and biological  
507 implications,” *ChemBioChem*, vol. 5, pp. 170–176, 2004.
- 508 [33] J. Forsting, J. Kraxner, H. Witt, A. Janshoff, and S. Köster, “Vimentin intermediate  
509 filaments undergo irreversible conformational changes during cyclic loading,” *bioRxiv*,  
510 p. doi10.1101/673673, 2019.
- 511 [34] W. H. Moolenaar, L. G. J. Tertoolen, and S. W. De Laat, “The regulation of cytoplasmic  
512 pH in human fibroblasts,” *J. Biol. Chem.*, vol. 259, no. 12, pp. 7563–7569, 1984.
- 513 [35] L. A. Schneider, A. Korber, S. Grabbe, and J. Dissemond, “Influence of pH on wound-



- 514 healing: A new perspective for wound-therapy?,” *Arch. Dermatol. Res.*, vol. 298, pp. 413–  
515 420, 2007.
- 516 [36] J. L. Walker, B. M. Bleaken, A. R. Romisher, A. A. Alnwibit, and A. S. Menko, “In wound  
517 repair vimentin mediates the transition of mesenchymal leader cells to a myofibroblast  
518 phenotype,” *Mol. Biol. Cell*, vol. 29, no. 13, pp. 1555–1570, 2018.
- 519 [37] R. Janissen, B. A. Berghuis, D. Dulin, M. Wink, T. Van Laar, and N. H. Dekker, “Invin-  
520 cible DNA tethers: Covalent DNA anchoring for enhanced temporal and force stability in  
521 magnetic tweezers experiments,” *Nucleic Acids Res.*, vol. 42, no. 18, p. e137, 2014.
- 522 [38] S. Winheim, A. R. Hieb, M. Silbermann, E.-M. Surmann, T. Wedig, H. Herrmann, J. Lan-  
523 gowski, and N. Mücke, “Deconstructing the late phase of vimentin assembly by total in-  
524 ternal reflection fluorescence microscopy (TIRFM),” *PLoS ONE*, vol. 6, no. 4, p. e19202,  
525 2011.
- 526 [39] Y.-H. Li and S. Gregory, “Diffusion of ions in sea water and in deep-sea sediments,”  
527 *Geochim. Cosmochim. Ac.*, vol. 38, pp. 703–714, 1974.

528 **Acknowledgements:**

529 **General:** We thank Johanna Forsting, Julia Kraxner, Harald Herrmann and Jan Christoph  
530 Thiele for helpful discussions, Susanne Bauch and Kamila Sabagh for technical support and  
531 Heidi Somsel for critical reading of the manuscript.

532 **Funding:** This project was funded by the European Research Council (ERC) under the Euro-  
533 pean Unions Horizon 2020 research and innovation program (Consolidator Grant Agreement  
534 no. 724932). The work further received financial support via an Excellence Fellowship of  
535 the International Max Planck Research School for Physics of Biological and Complex Systems  
536 (IMPRS PBCS) and the Max Plank School “Matter to Life”.

537 **Author contributions:** SK conceived and supervised the project. AVS performed the exper-  
538 iments and the data analysis. CL developed the method for force-strain data averaging, im-  
539 plemented the model and performed the simulations. SK and AVS wrote the manuscript. All  
540 authors read and commented on the manuscript.

541 **Competing interests:** The authors declare no conflict of interest.

542 **Data Availability:** All data that support the findings of this study are presented in the main text  
543 and Supporting Information. Upon reasonable request, raw data will be made available by the  
544 corresponding author.

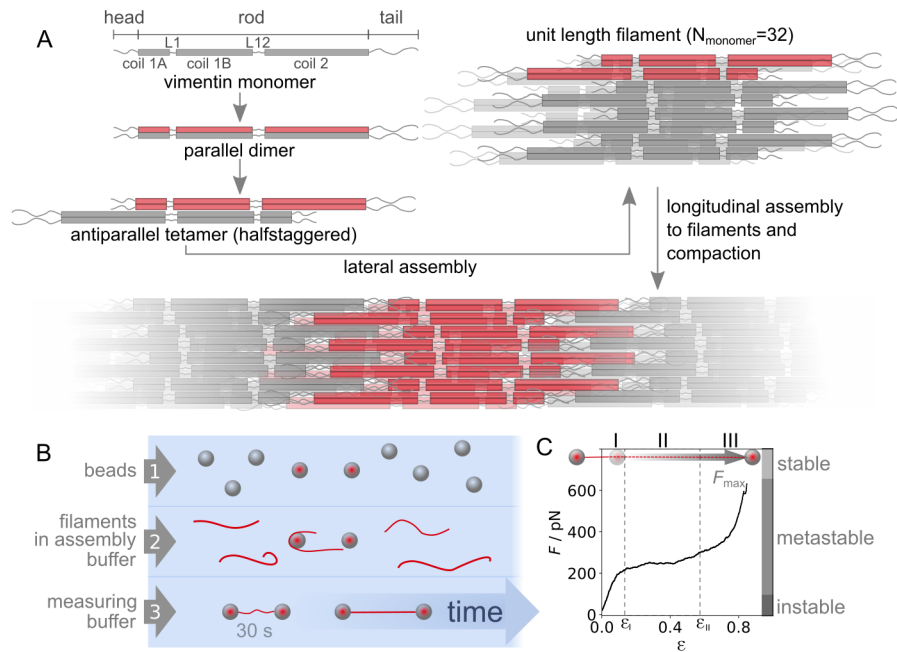

**Fig. 1: Stretching experiments on fully assembled vimentin filaments.** (A) Schematic of the hierarchical assembly of vimentin monomers into filaments. In each step, the respective precursor subunit is highlighted in red. (B) Measurement protocol of the optical trap experiment in microfluidic flow channels: Two beads are captured and calibrated (1), a single filament is covalently attached to both beads (2) and stretched after a 30 s incubation period in the measuring buffer (3). (C) Typical force-strain curve for a vimentin filament showing the elastic (I), plateau (II) and stiffening (III) regime. The strain at the transition of region I to II is  $\epsilon_I$ , from II to III it is  $\epsilon_{II}$ . The force ranges for classifying the filaments according to their stability are indicated on the right.

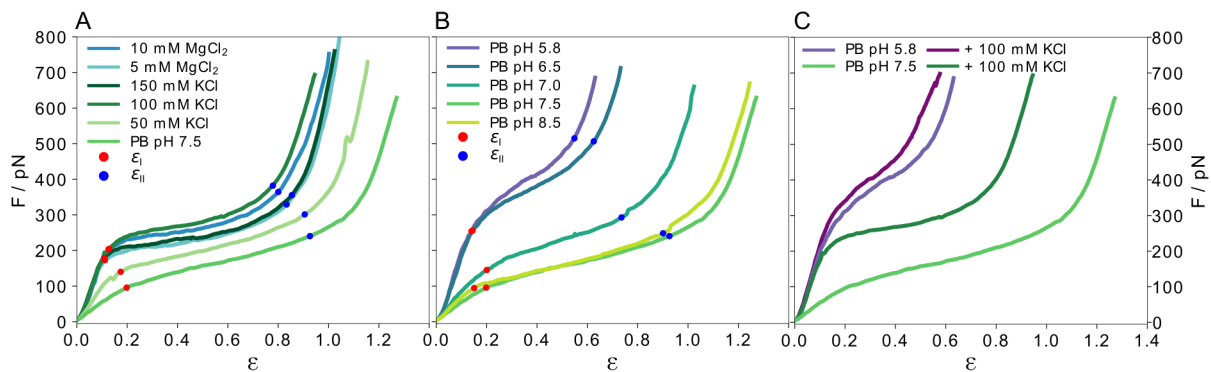

**Fig. 2: Force-strain behaviour of single vimentin filaments.** All curves shown are averages of the individual measurements shown in Supplementary Figs. S1 and S2. The strain values at the end of the initial linear regime  $\epsilon_I$  (red) and the plateau regime  $\epsilon_{II}$  (blue) for all average curves are indicated. **(A)** Effect of indirect charge shifts caused by salt ions in the measurement buffer. **(B)** Effect of direct charge shifts by varying pH conditions. While  $\epsilon_I$  is similar in all measurements,  $\epsilon_{II}$  increases for lower  $c(\text{KCl})$  and for increasing pH. **(C)** Comparison of the effect of an addition of 100 mM  $\text{K}^+$  ions at pH 7.5 and 5.8.

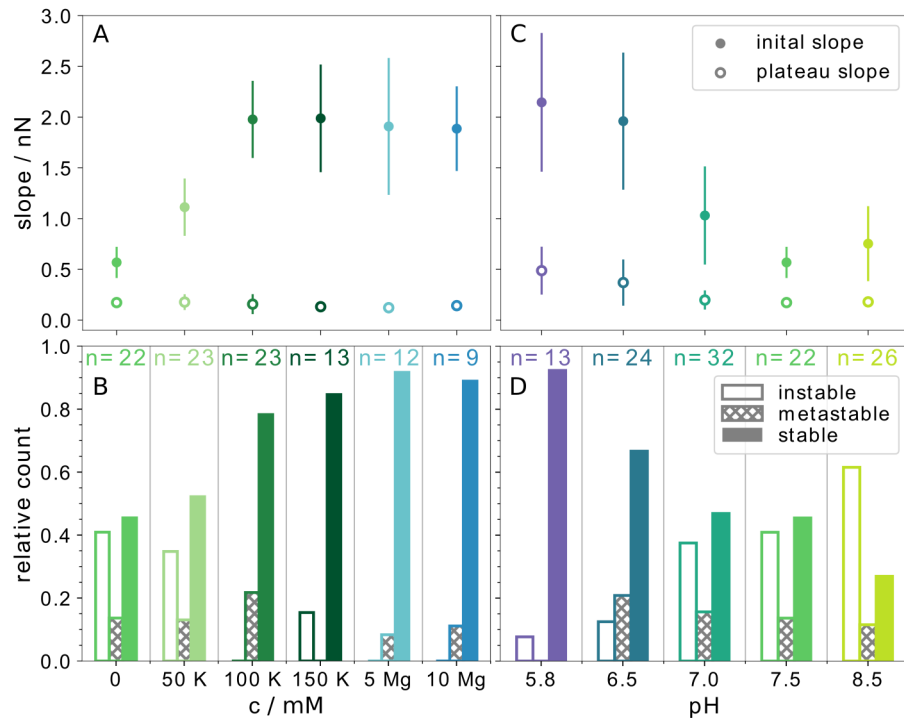

**Fig. 3: Mechanical properties of single vimentin filaments.** (A),(C) Analysis of the initial slopes (solid circles) and slopes of the plateau regions (open circles) of all metastable and stable filaments. The error bars indicate the standard deviation. (B),(D) The stability of the measured filaments is presented as fractions of instable, metastable and stable filaments.

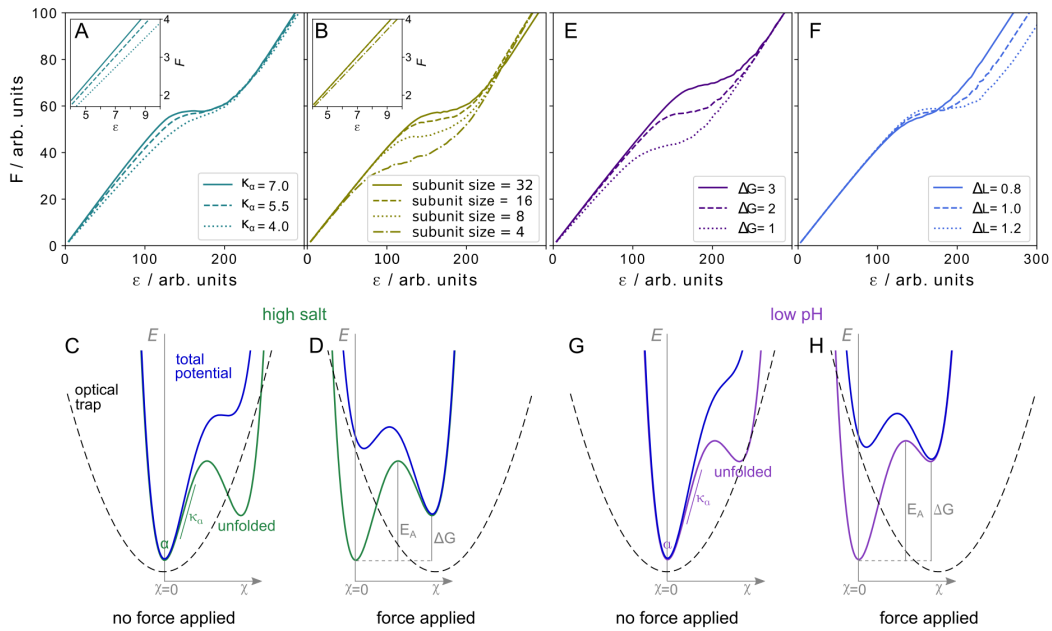

**Fig. 4: Monte-Carlo simulations of force-strain curves and schematics of energy landscapes.** (A) An increased  $\kappa_\alpha$  causes an increase of the initial slope. (B) A stronger coupling into larger subunits moves the plateau to higher forces, decreases the slope of the plateau and weakly influences the initial slope. The insets in a and b show the initial slope for each parameter set. (C) Energy landscape  $E$  plotted against the reaction coordinate  $\chi$  with minima for the alpha- and unfolded state at high salt conditions (green) within the harmonic potential corresponding to the optical trap (dashed line). The resulting total potential is shown in blue. Without applied load, the alpha-state is stable. (D) By moving the optical trap, and thereby the harmonic potential, the energy barrier is reduced and the unfolded state becomes more probable. (E) A higher free energy difference  $\Delta G$  between the alpha- and unfolded state increases  $F_{\text{plateau}}$  without affecting the slope of the plateau. (F) Increasing the length of the unfolded monomer increases  $\varepsilon_{\text{II}}$ . (G) The suggested energy landscape at low pH, which leads to an increased energy barrier  $\Delta G$ , shows a higher  $E_A$  making the transition to the unfolded state less probable, (H) even after applying the same trap load as in (F).

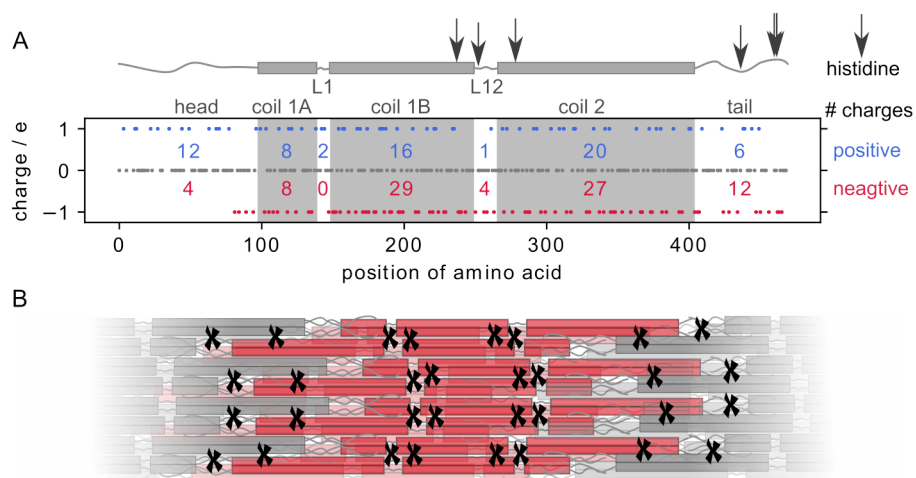

**Fig. 5: Charged amino acids in vimentin.** (A) Top: Schematic representation of the vimentin monomer. The positions of histidines in one vimentin monomer are marked with arrows. Bottom: The charges of the amino acids are plotted versus their position in the sequence. The number of amino acids that carry a positive (lysine and arginine, blue) or negative charge (aspartic acid and glutamic acid, red) at pH 7.4 are shown for the head, coils, linkers and tail. (B) The possible additional intra-filament interaction sites upon charge changes in the histidines are marked by 'x' for the visible front half of the red ULF.

545 **Supplementary Materials**



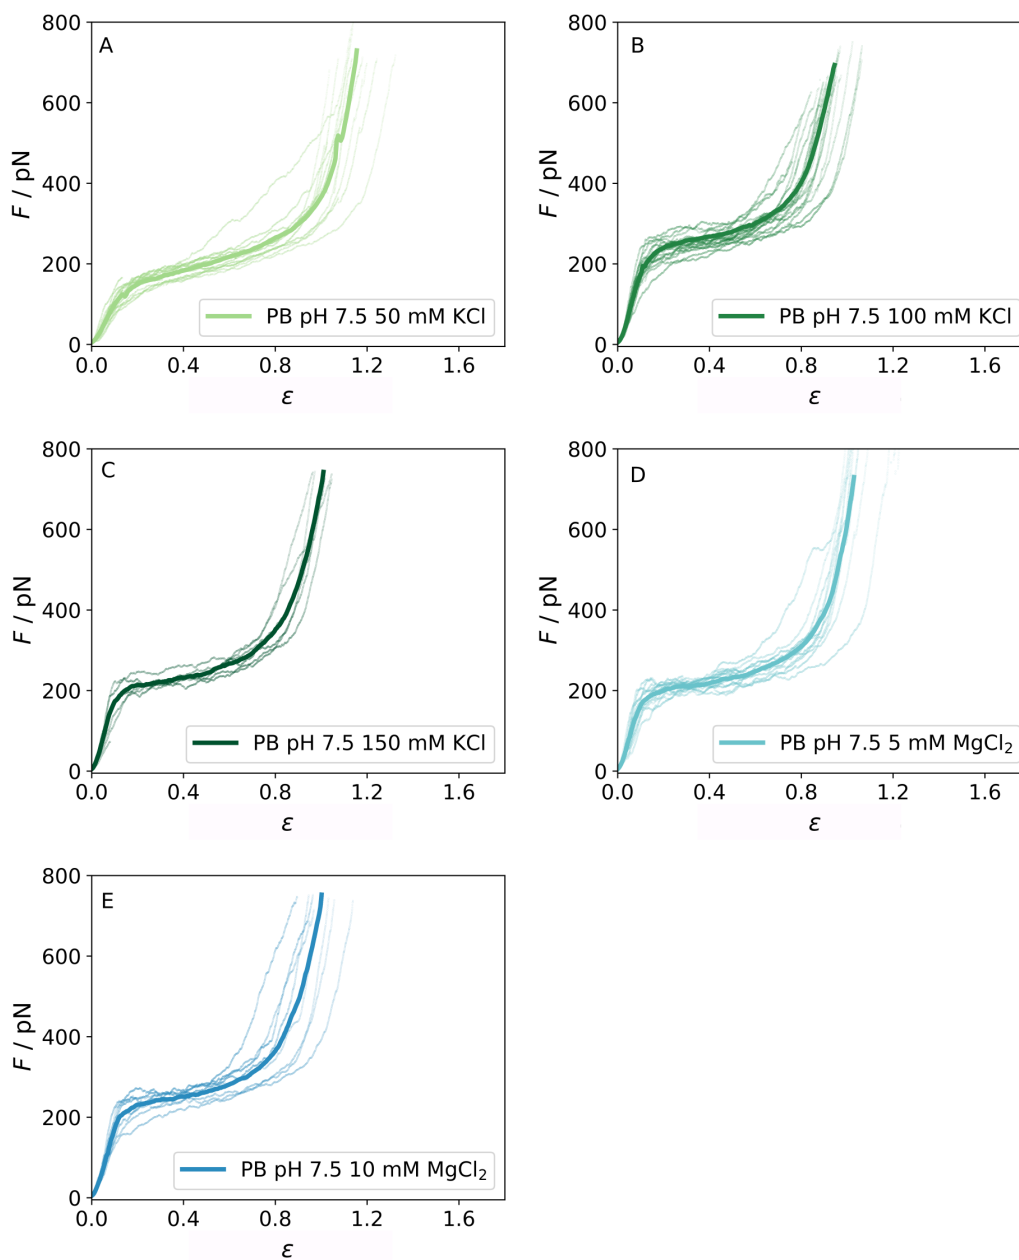

**Fig. S1: Force-strain curves for each salt condition measured.** (A)-(E) All single measurements of meta stable and stable filaments are plotted (thin lines) along with the average curves (bold lines, as shown in Fig. 2a in the main text).

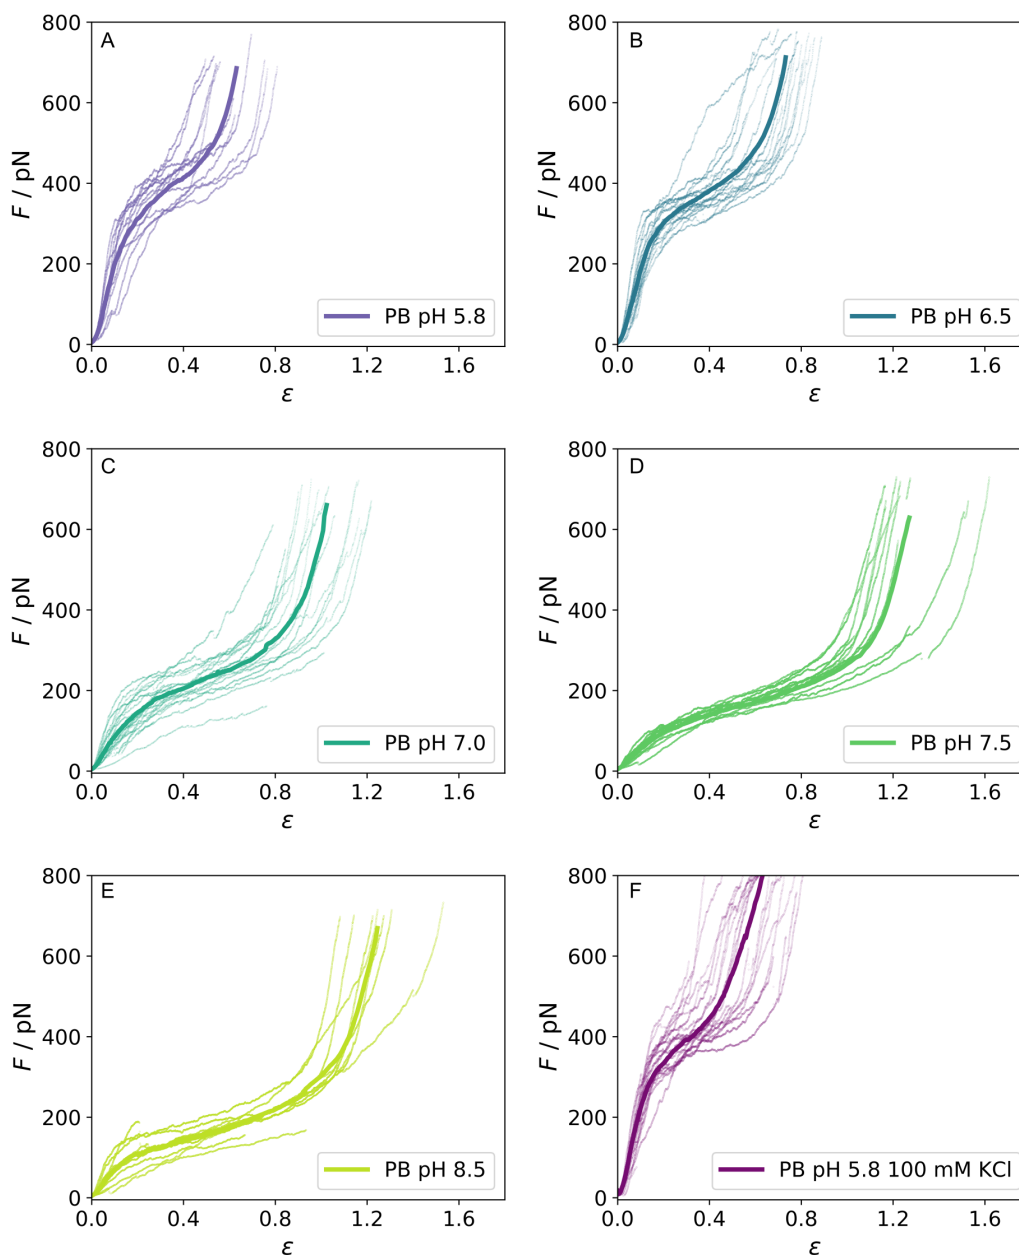

**Fig. S2: Force-strain curves for each pH condition measured.** All single measurements of meta stable and stable filaments are plotted (thin lines) along with the average curve (bold lines, as shown in Fig. 2b) (A)-(E) Show data recorded at increasing pH values and (F) measurements at pH 5.8 with 100 mM KCl.

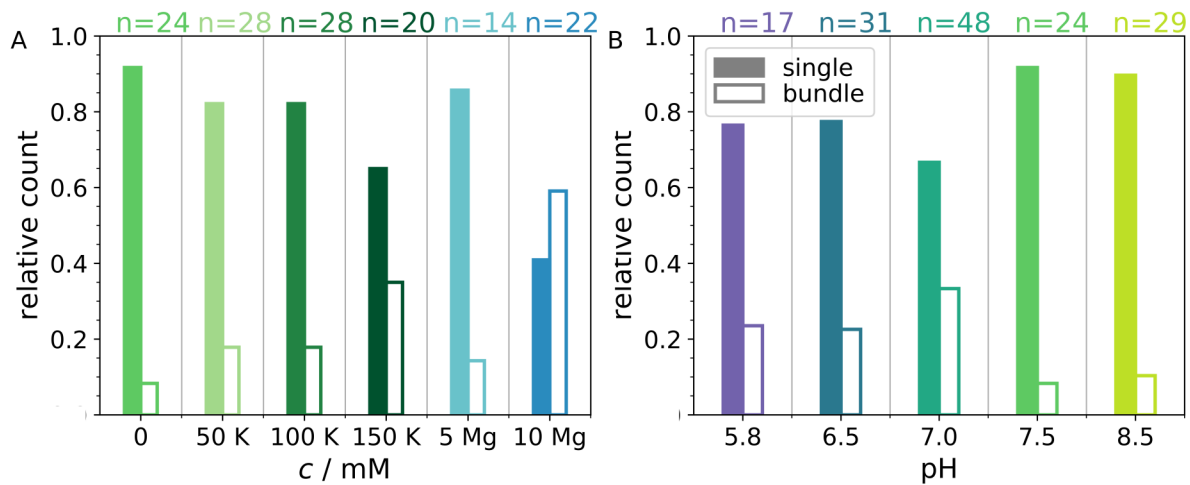

**Fig. S3: Relative count of single filaments and bundles for each condition.** The bundles were identified from the confocal images and from the force data. Only single filaments were used in further analysis. **(A)** The increased fraction of bundles at higher salt concentrations indicates that the ions promote filament bundling. **(B)** The fraction of bundles does not show a trend at different pH conditions.

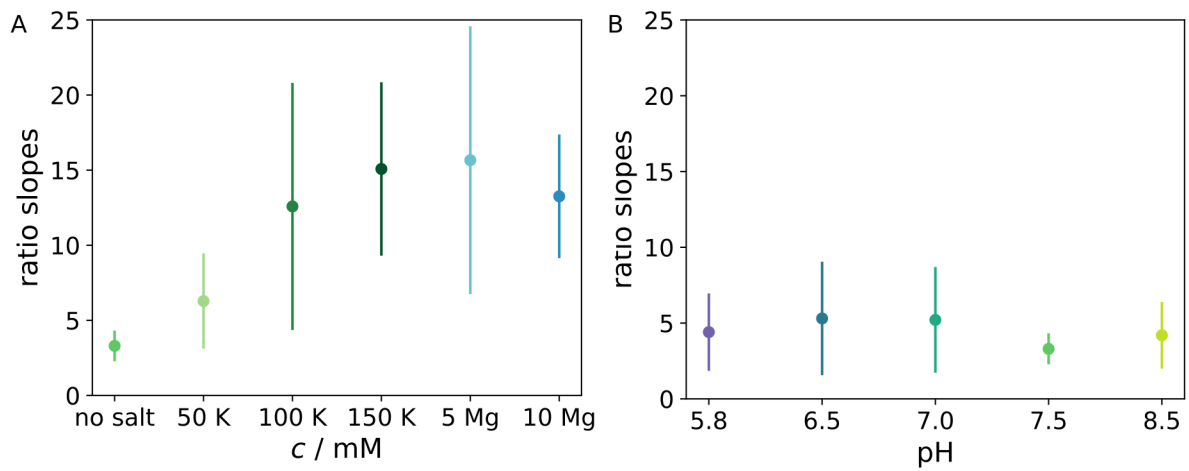

**Fig. S4: The ratio of the initial slope and the slope of the plateau for each measuring condition.** The respective slopes are presented in Fig. 3 in the main text. **(A)** The ratio changes at different salt conditions as the plateaus have the same slope, whereas the initial increase changes at different salt conditions. **(B)** The ratio of the slopes in buffers of increasing pH stays relatively constant.

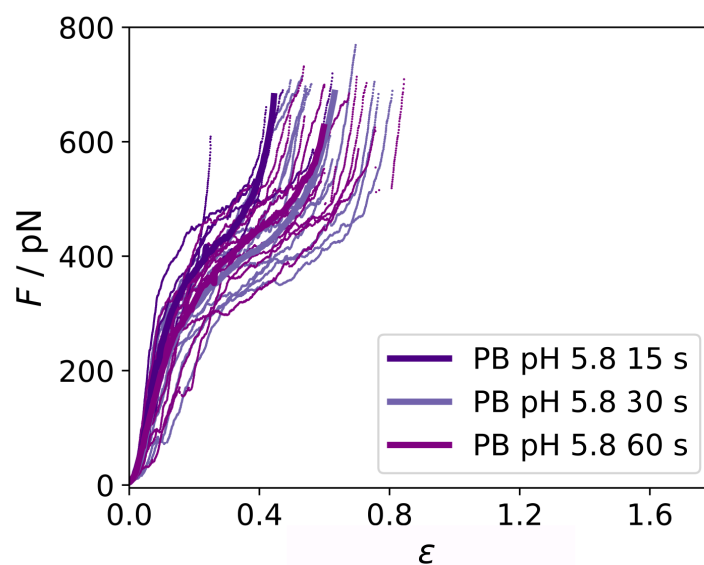

**Fig. S5: Force-strain curves for filaments stretched in phosphate buffer (PB), pH 5.8 with varying incubation times.** All single measurements are plotted by thin lines, the average curves are shown by bold lines. Within the variation of the single curves in each condition there is no difference apparent between the incubation times.

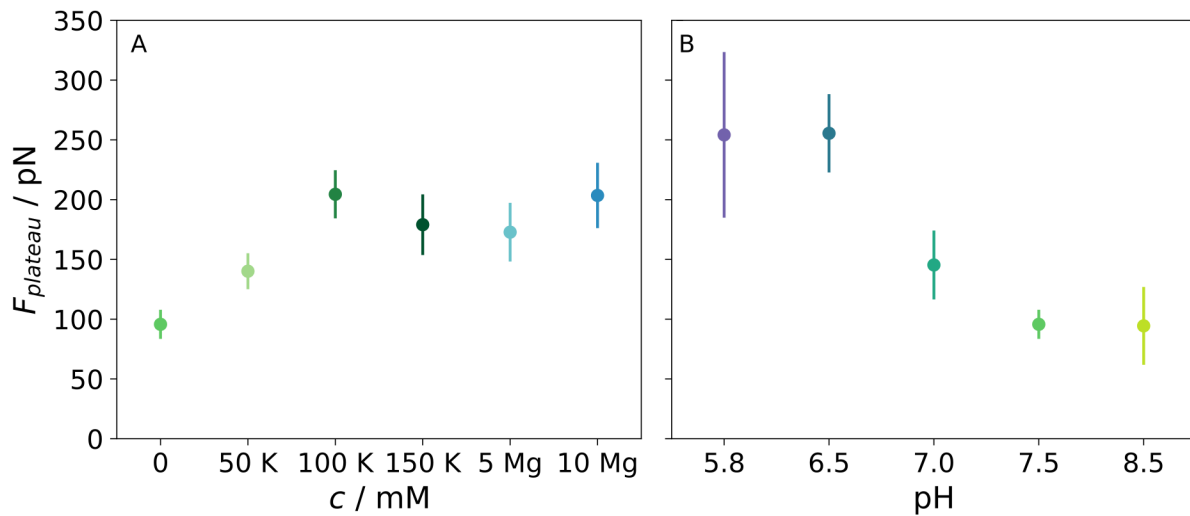

**Fig. S6: Plateau force of the force-strain curves.** The force at  $\epsilon_I$  is shown for all single force-strain curves for each condition. The error bars correspond to the standard deviation. **(A)**  $F_{\text{plateau}}$  from curves recorded at pH 7.5 with varying salt concentrations. The plateau is shifted to higher forces for higher KCl concentrations or in the presence of  $\text{MgCl}_2$ . **(B)**  $F_{\text{plateau}}$  extracted from the force-strain curves measured at varying pH values. The plateau appears at higher forces for lower pH conditions.

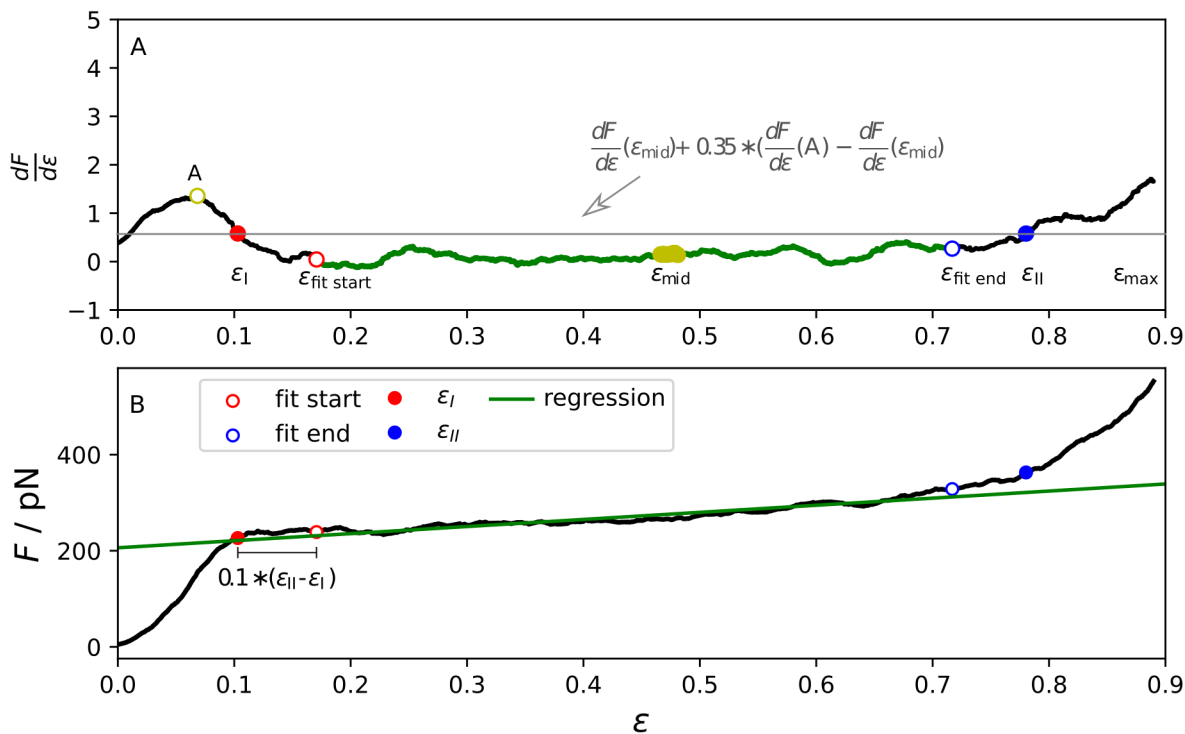

**Fig. S7: Analysis of the slope of the plateau for one single force-strain curve.** (A) Differential force-strain curve, smoothed with a moving average with the window width of  $\frac{1}{20}$  of number of data points in the curve before  $\epsilon_{max}$ . The centre of the curve ( $\epsilon_{mid}$ ) is marked in yellow. The peak of  $\frac{dF}{d\epsilon}(A)$  is shown with the open yellow circle. The threshold for the plateau is indicated with the grey line. The values for  $\epsilon_I$  (red, solid) and  $\epsilon_{II}$  (blue, solid) at the threshold are shown. The open red and blue circles flank the region used for the calculation of the regression (green). (B) Resulting regression plotted together with the raw force-strain curve.

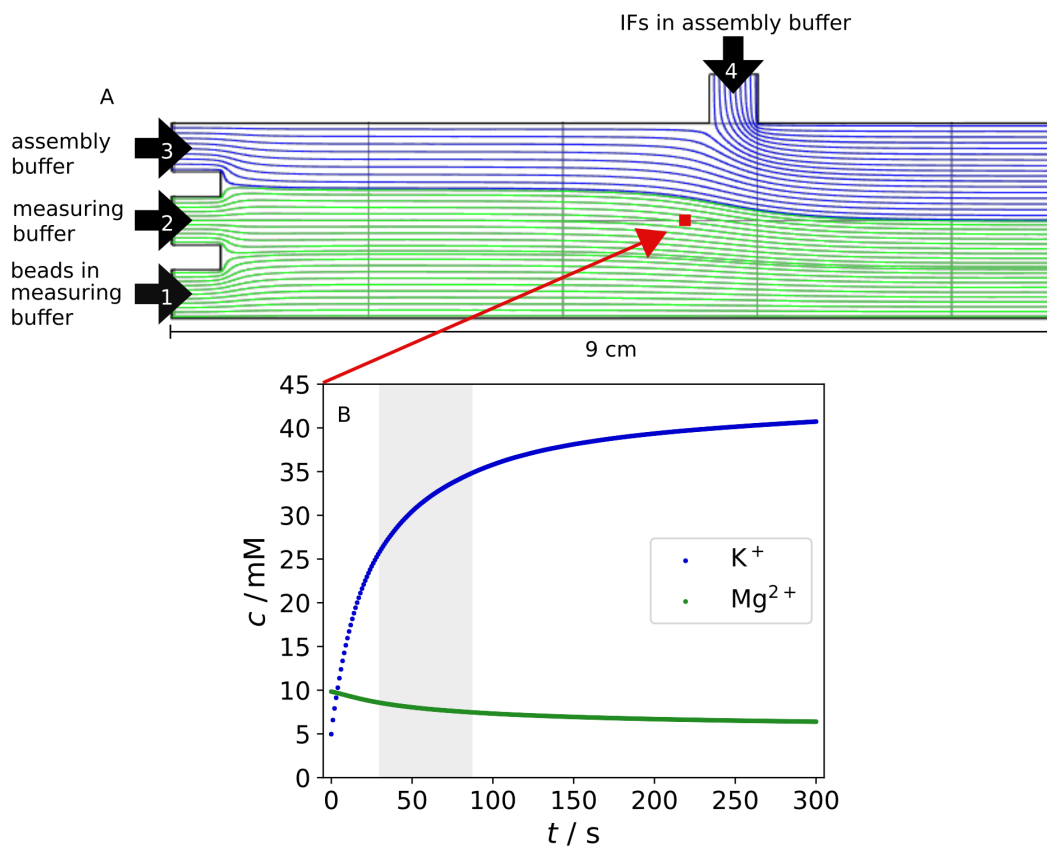

**Fig. S8: Results of FEM simulations.** (A) Schematic of the flow cell including simulated stream lines of the in-flowing buffers. In the experiment, beads in measuring buffer are injected in channel 1, measuring buffer in channel 2, assembly buffer in channel 3 and vimentin in assembly buffer in channel 4. The colours correspond to the cation species of the buffer (blue:  $K^+$ , green:  $Mg^{2+}$ ). For this simulation, the measuring buffer contained 10 mM  $Mg^{2+}$  and the assembly buffer 100 mM  $K^+$ . IFs and beads were not included in the simulation. The position of the measurement is marked in red and corresponds to the position for which the development of the cation concentrations after stopping the flow was calculated. (B) Plot of the temporal evolution of the concentrations of  $Mg^{2+}$  and  $K^+$  ions at the measurement position after stopping the flow. The time window of the measurement is indicated.
